# Supplementary material
Source: ML conference proceedings conference paper supplement (https://openreview.net/forum?id=KD6MFeWSAd)

Iteration 100

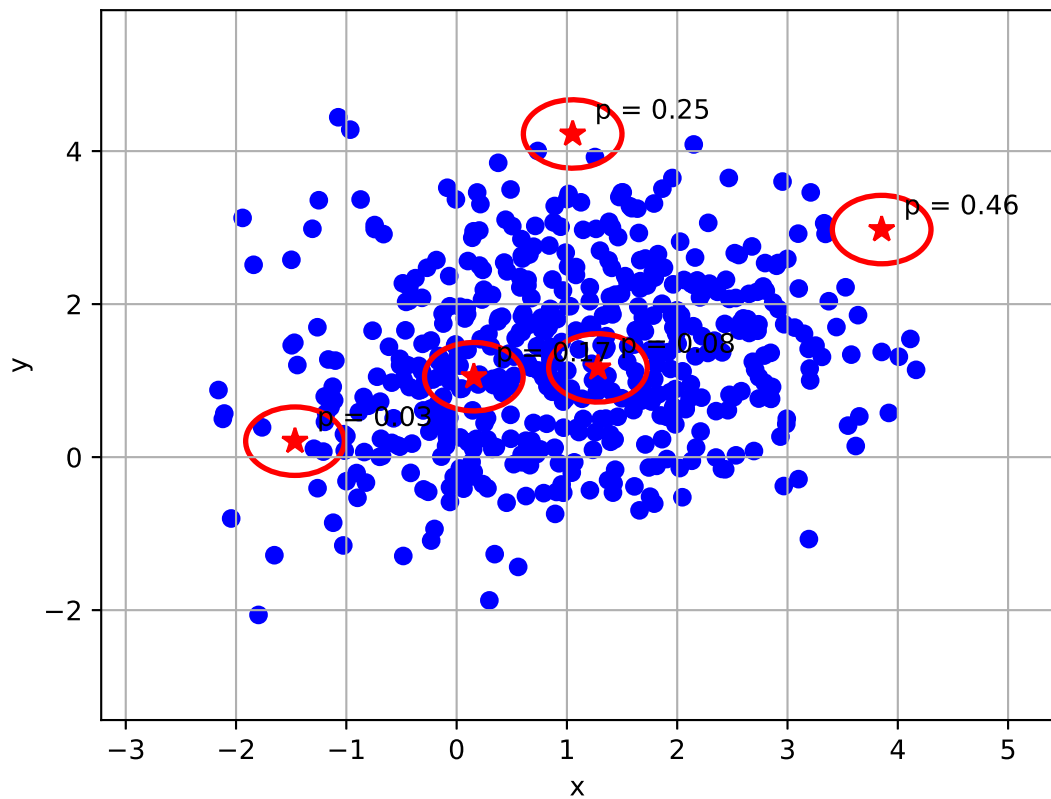

Supplement: supplementary_material [file attachment]

Iteration 200

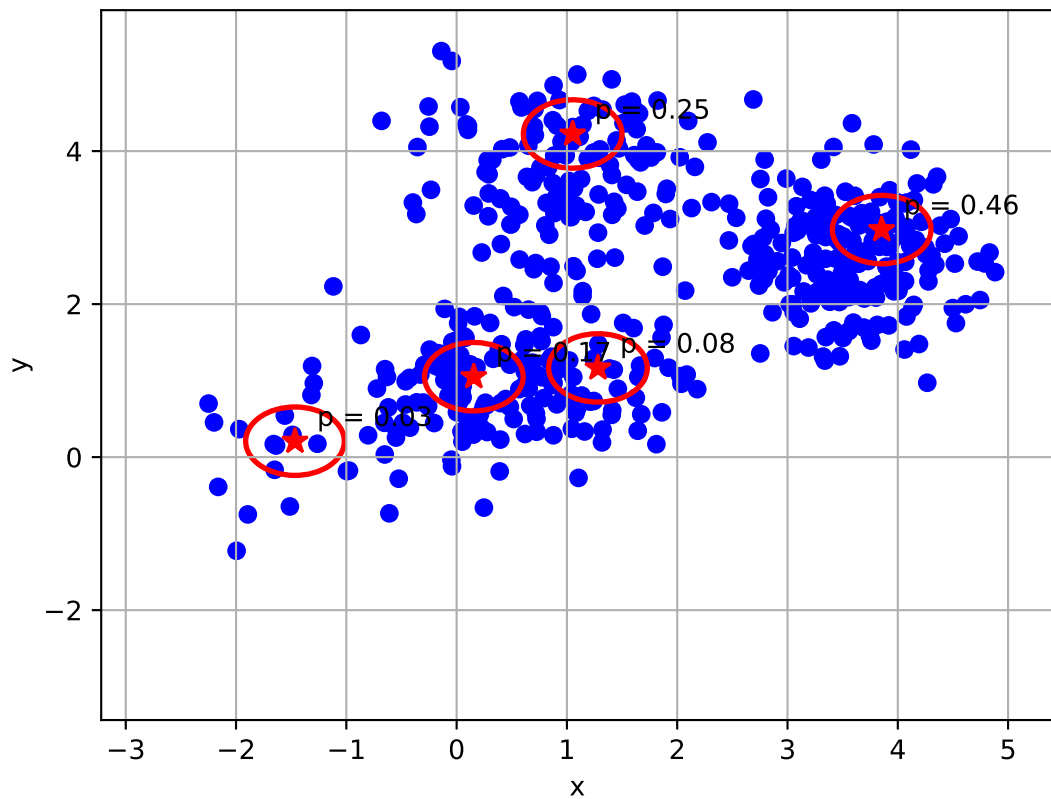

Supplement: supplementary_material [file attachment]

Iteration 0

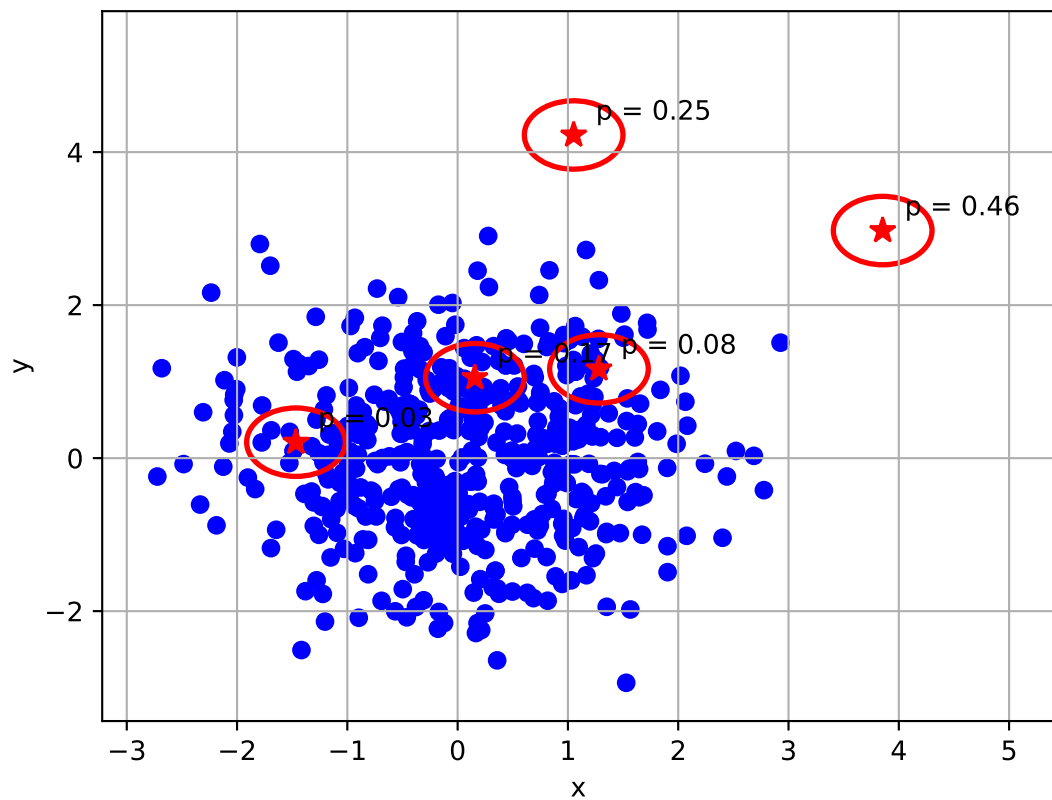

Supplement: supplementary_material [file attachment]

Iteration 100

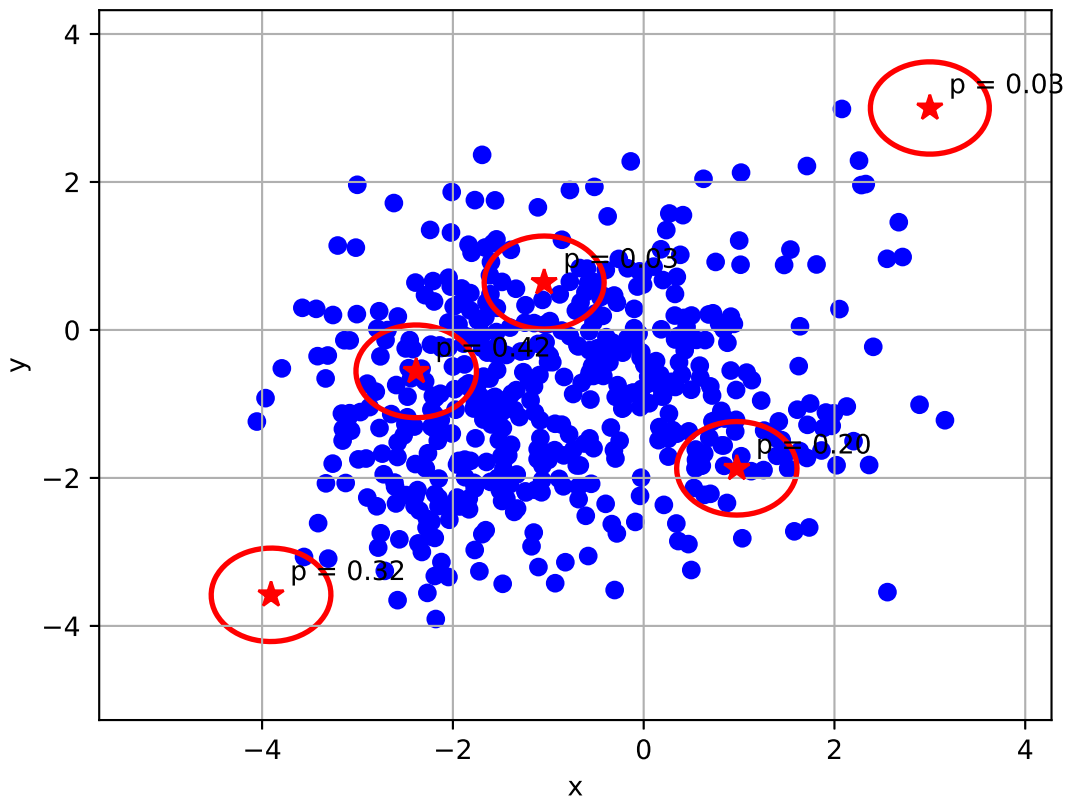

Supplement: supplementary_material [file attachment]

Iteration 0

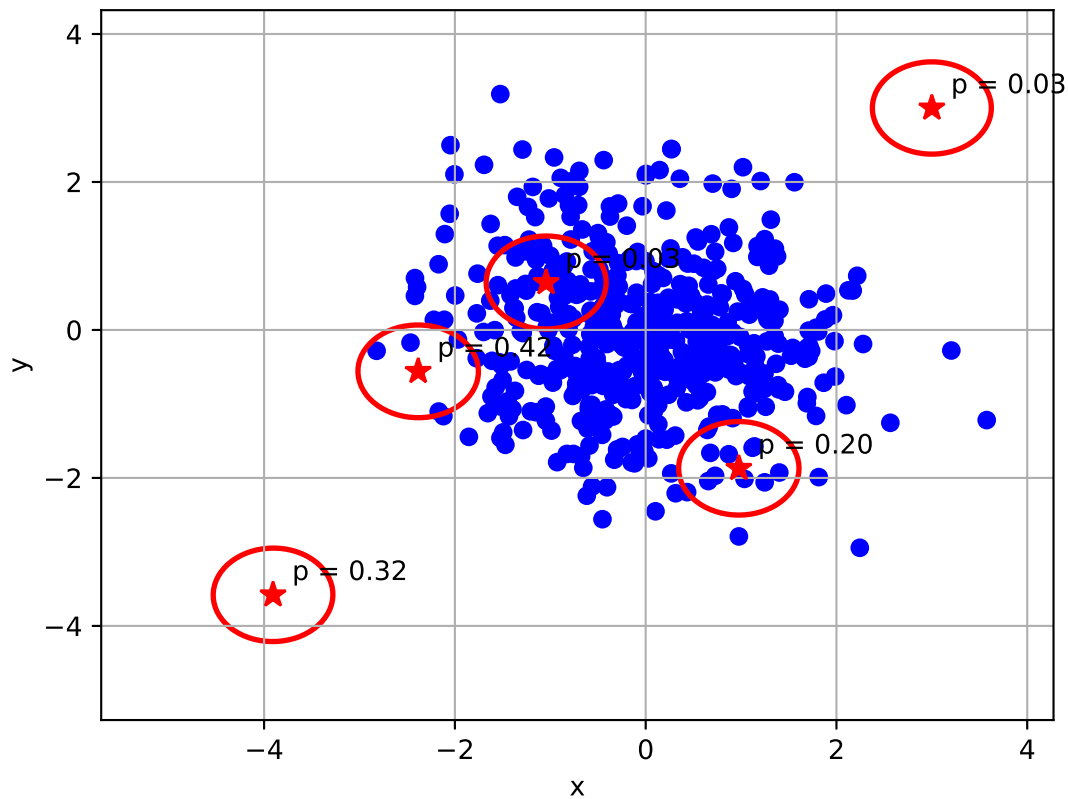

Supplement: supplementary_material [file attachment]

Iteration 200

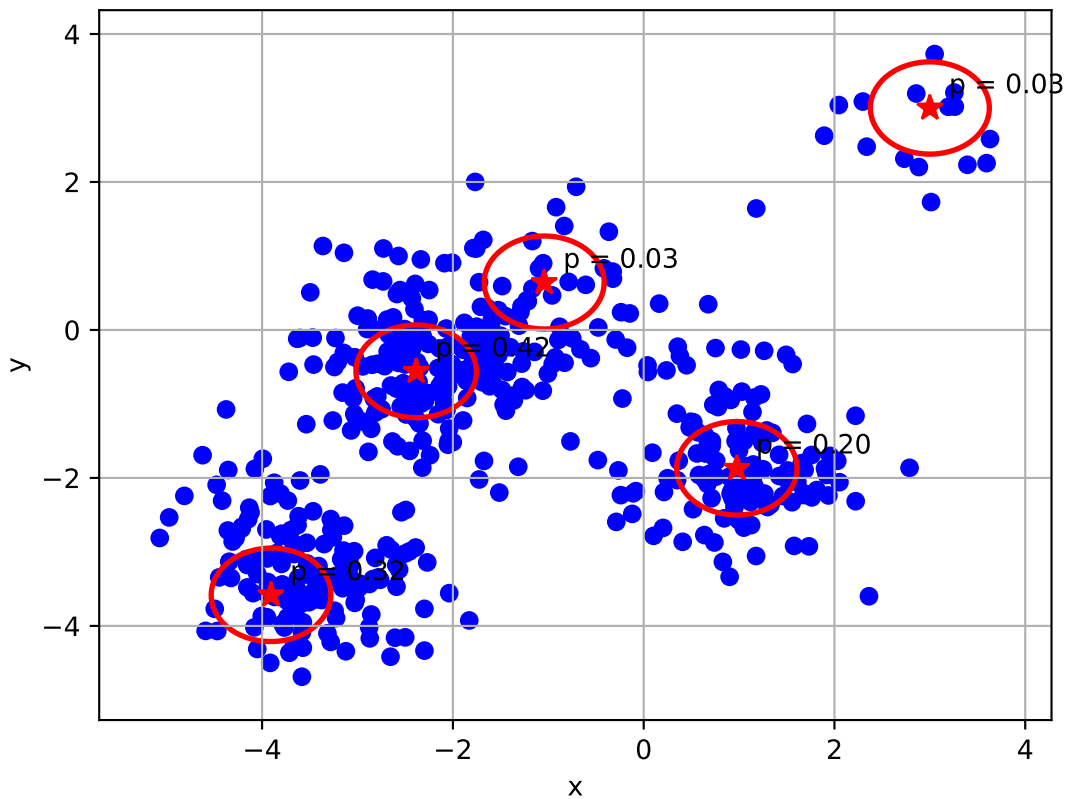

Supplement: supplementary_material [file attachment]

Iteration 300

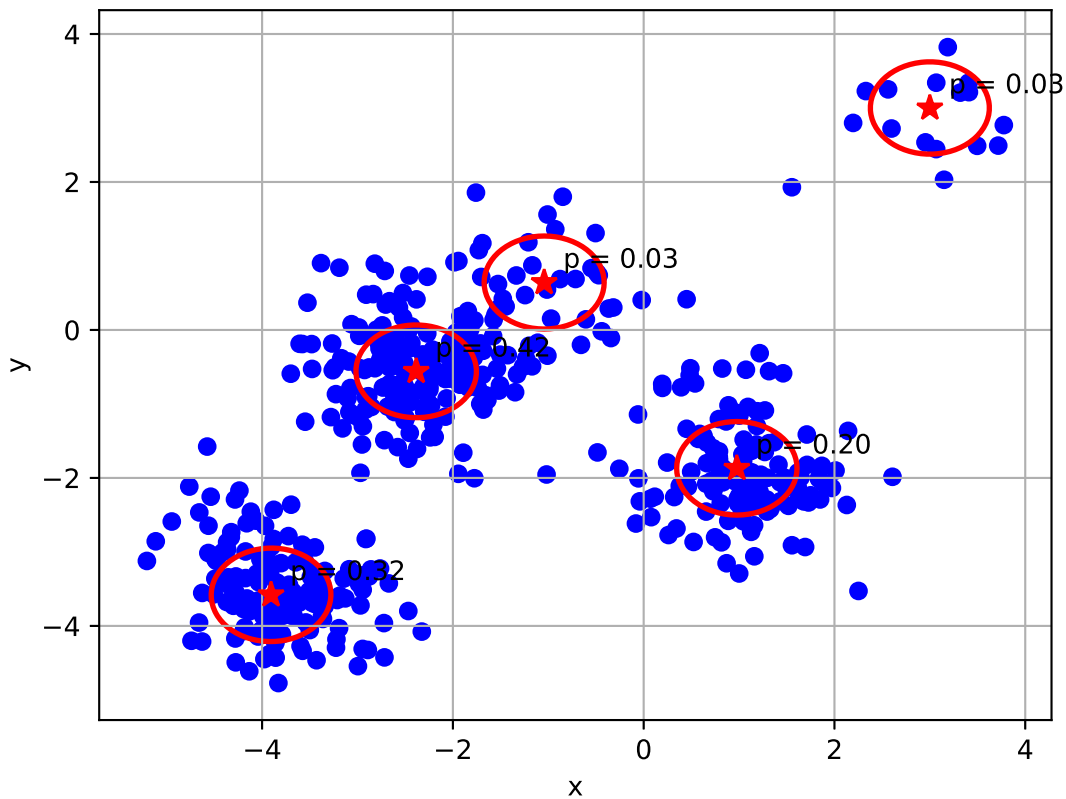

Supplement: supplementary_material [file attachment]

Iteration 300

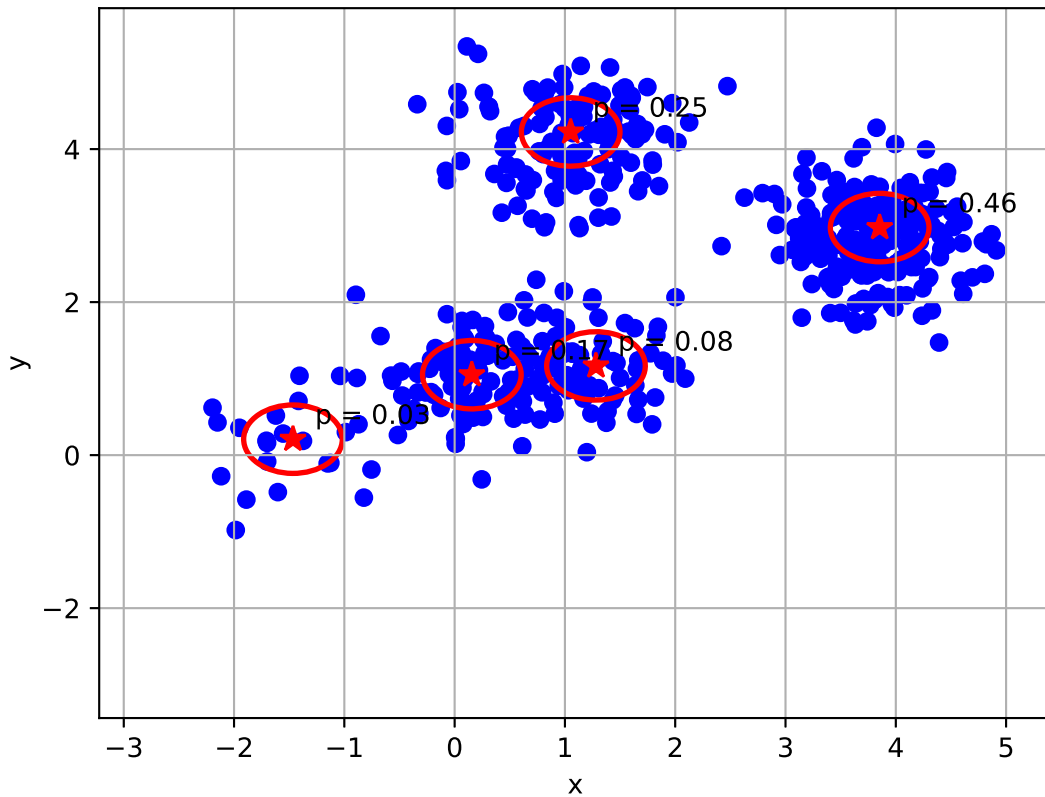

Supplement: supplementary_material [file attachment]
